# Supplementary material for: Immune profile of patients with peritoneal carcinomatosis selected for CRS-HIPEC therapy
Source: Springer Nature journal article supplement (doi:10.1007/s00262-023-03515-2), 2023-08-14
Supplement: MOESM1 [file 25920846]

|                | BUV395      | BUV661     | KB520       | ECD         | PerCP      | PE           | AF594       | PC5.5        | PC7          | AF647        | AF700       | AF750         | BV421       | BV510      | BV785         | Viability |
|----------------|-------------|------------|-------------|-------------|------------|--------------|-------------|--------------|--------------|--------------|-------------|---------------|-------------|------------|---------------|-----------|
| <b>Antigen</b> | <b>CD45</b> | <b>CD3</b> | <b>CCR7</b> | <b>CD27</b> | <b>CD8</b> | <b>TIGIT</b> | <b>CD57</b> | <b>CD279</b> | <b>CD127</b> | <b>VISTA</b> | <b>CD28</b> | <b>HLA-DR</b> | <b>CD39</b> | <b>CD4</b> | <b>CD45RA</b> | Live/Dead |
| Clone          | HI30        | UCHT1      | G043H7      | 1A4CD27     | SK1        | A15153G      | HNK1        | PD1.3        | A019D5       | MIH65.rMAb   | CD28.2      | Immu-357      | A1          | RPA-T4     | HI100         |           |
| Isotype        | mlgG1       | mlgG1      | mlgG2a      | mlgG1       | mlgG1      | mlgG2a       | mlgM        | mlgG2b       | mlgG1        | mlgG1        | mlgG1       | mlgG1         | mlgG1       | mlgG1      | mlgG2b        |           |
| Fluorochrome   | BUV395      | BUV661     | KB520       | ECD         | PerCP      | PE           | AF594       | PC5.5        | PC7          | AF647        | AA700       | AA750         | BV421       | BV510      | BV785         | ViaKr-808 |
| Vol. (µl)      | 2.5         | 2.0        | 2.5         | 4.0         | 1.5        | 5.0          | 0.6         | 4.5          | 5.0          | 5.0          | 2.0         | 2.0           | 5           | 2.0        | 2.5           | 1.0       |
| Supplier       | BD          | BD         | BioLegend   | BC          | BioLegend  | BioLegend    | BioLegend   | BC           | BioLegend    | BD           | BC          | BC            | BioLegend   | BioLegend  | BioLegend     | BC        |
| Cat.#          | 563792      | 612964     | 353260      | B26603      | 344708     | 372714       | 359626      | B36123       | 351320       | 749646       | B12696      | B42021        | 328214      | 300546     | 304140        | C36628    |
| Status         | RUO         | RUO        | RUO         | ASR         | RUO        | RUO          | RUO         | ASR          | RUO          | RUO          | ASR         | ASR           | RUO         | RUO        | RUO           | RUO       |

**Figure S1** Extracellular 16-colour antibody panel for flow cytometry analysis.  
T cell memory differentiation and exhaustion markers.

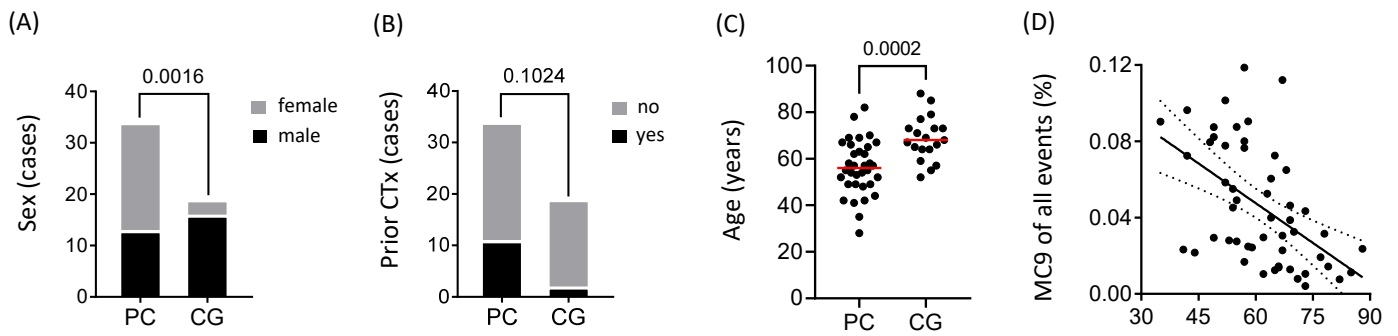

**Figure S2**

Analysis for potential co-variables

**(A)** Equal representation of males and females in the PC and CG patient groups (Fisher's exact test). **(B)** Predominance of patients who received prior adjuvant chemotherapy (Prior CTx) in PC versus CG patients (Fisher's exact test). **(C)** Patient ages in PC and CG groups (MW test). **(D)** MC9 cell frequencies correlated with patient age (Pearson  $R^2 = 0.265$ ,  $p < 0.0001$ ).

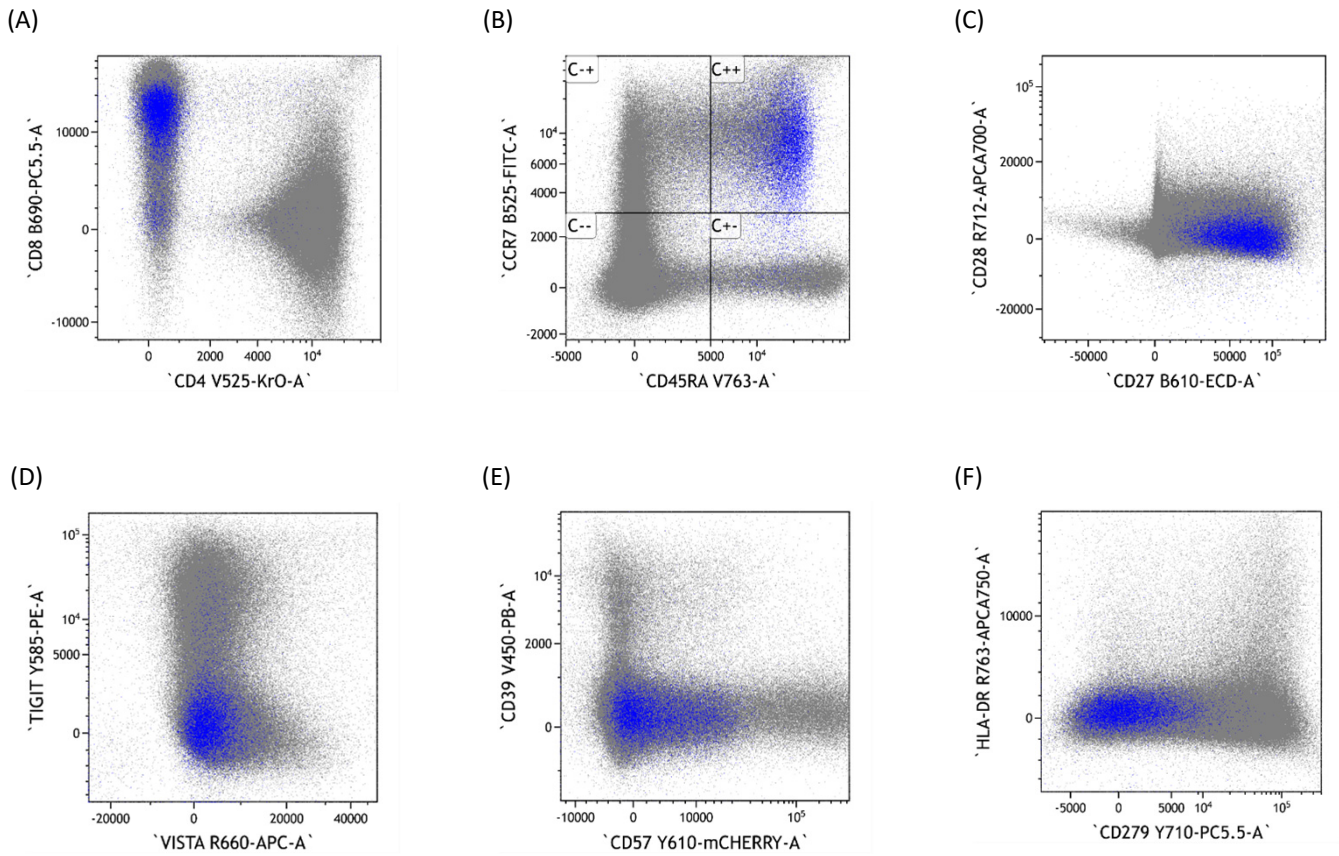

### Figure S3

#### Phenotypic definition of omental fat T cells contributing to MC9.

Combined dataset from n=34 PC patients comparing MC9 cells (blue) and all other events (grey). **(A)** Plot of CD4 versus CD8 expression. **(B)** Plot of CD45RA versus CCR7 expression. **(C)** Plot of CD27 versus CD28. **(D)** Plot of VISTA versus TIGIT. **(E)** Plot of CD57 versus CD39. **(F)** Plot of CD279 versus HLA-DR.

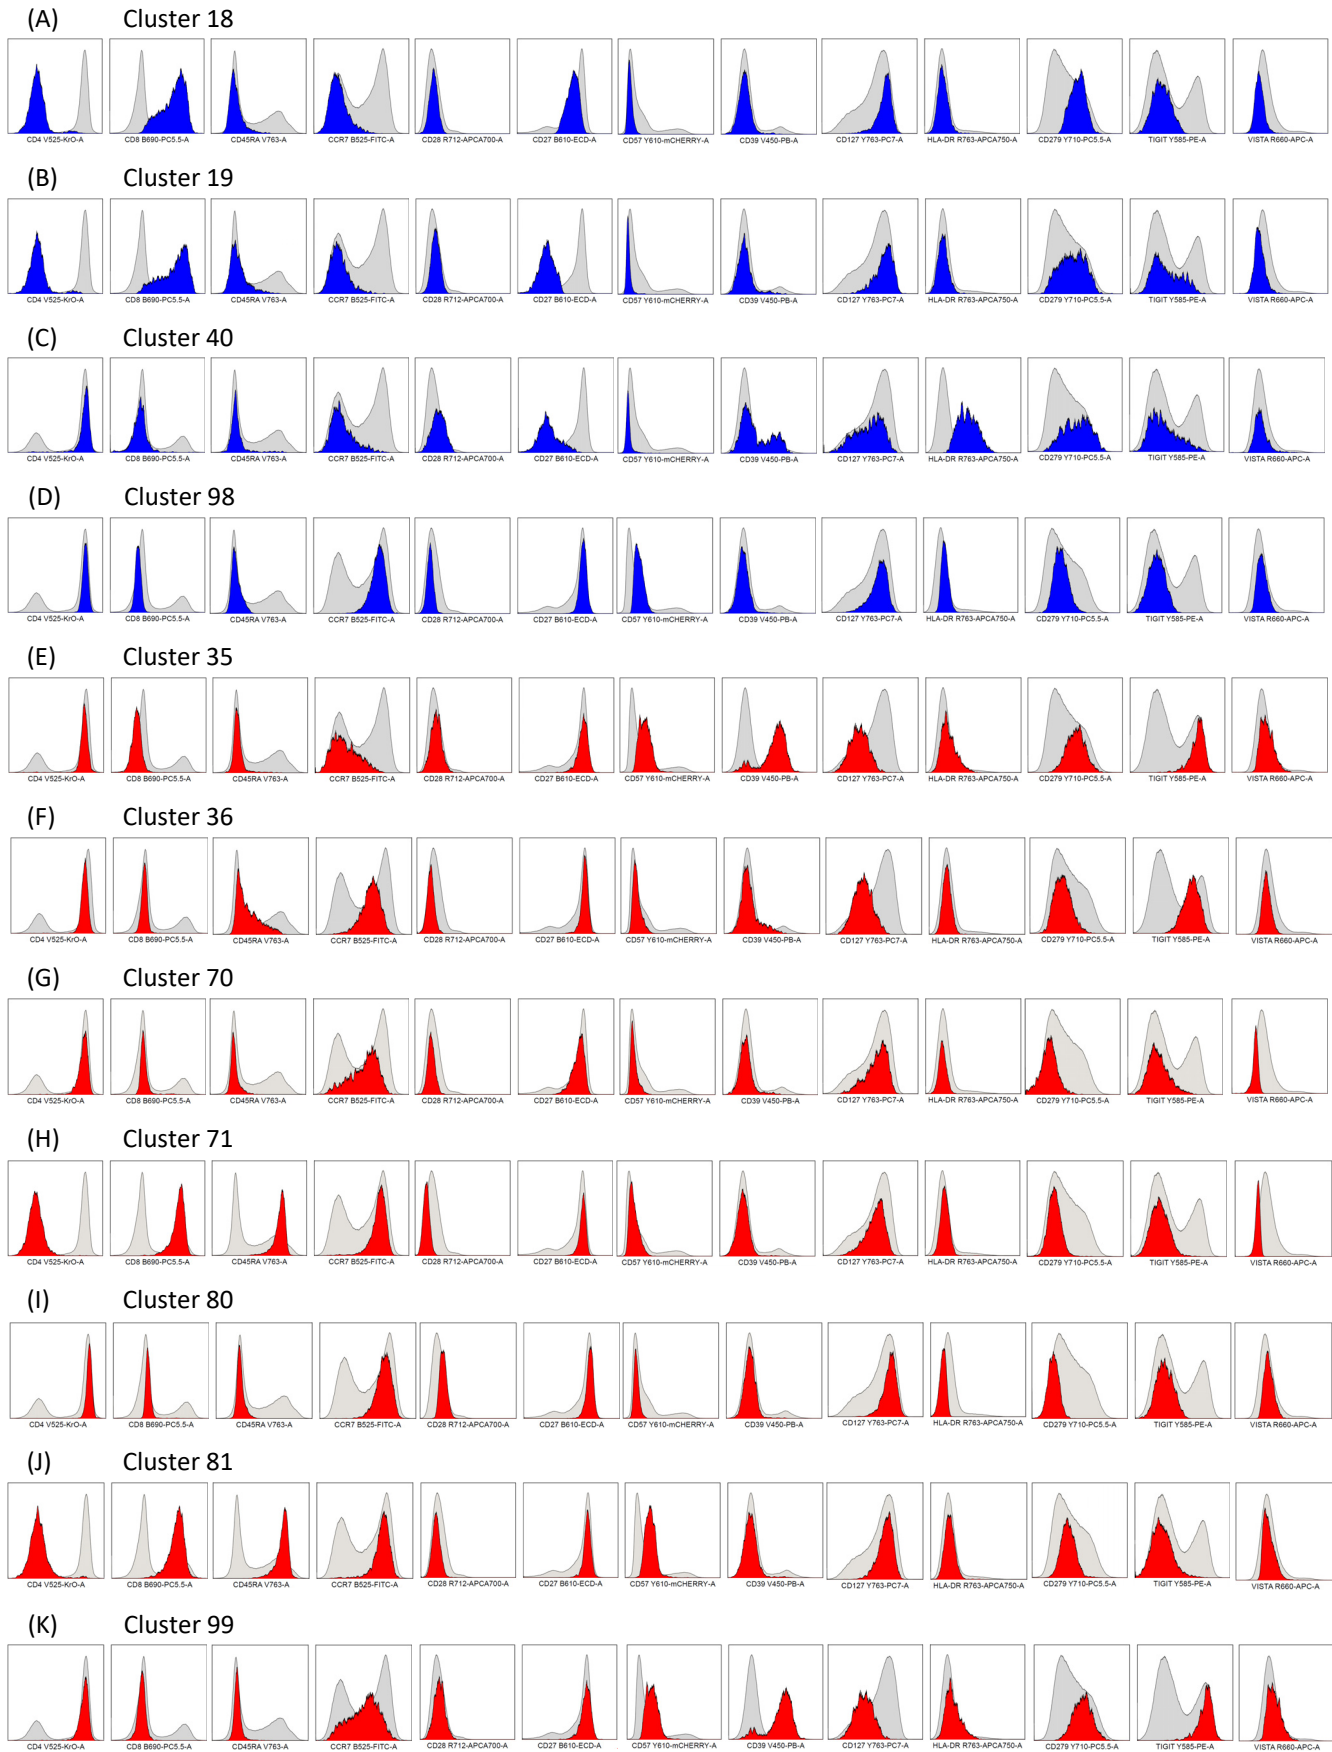

**Figure S4**

Phenotypic definition of omental fat T cells over- or under-represented in PC patients. Overlay plots comparing manually gated T cells (blue = under-represented, red = over-represented) and all other ungated cells (grey). Level of expression for every single marker.
